# Supplementary material for: Clinical Features and Outcomes of Patients With Malignancy and Takotsubo Syndrome: Observations From the International Takotsubo Registry
Source: PubMed Central journal article supplement — J Am Heart Assoc. 2019 Jul 17;8(15):e010881. doi: 10.1161/JAHA.118.010881 (PMC6761645; doi:10.1161/jaha.118.010881), 2019-07-17
Supplement: JAH3-8-e010881-s001.pdf [file JAH3-8-e010881-s001.pdf]

# **SUPPLEMENTAL MATERIAL**

**Figure S1. Cox-regression for long-term mortality with cluster robust standard errors adjusted for 9 countries.**

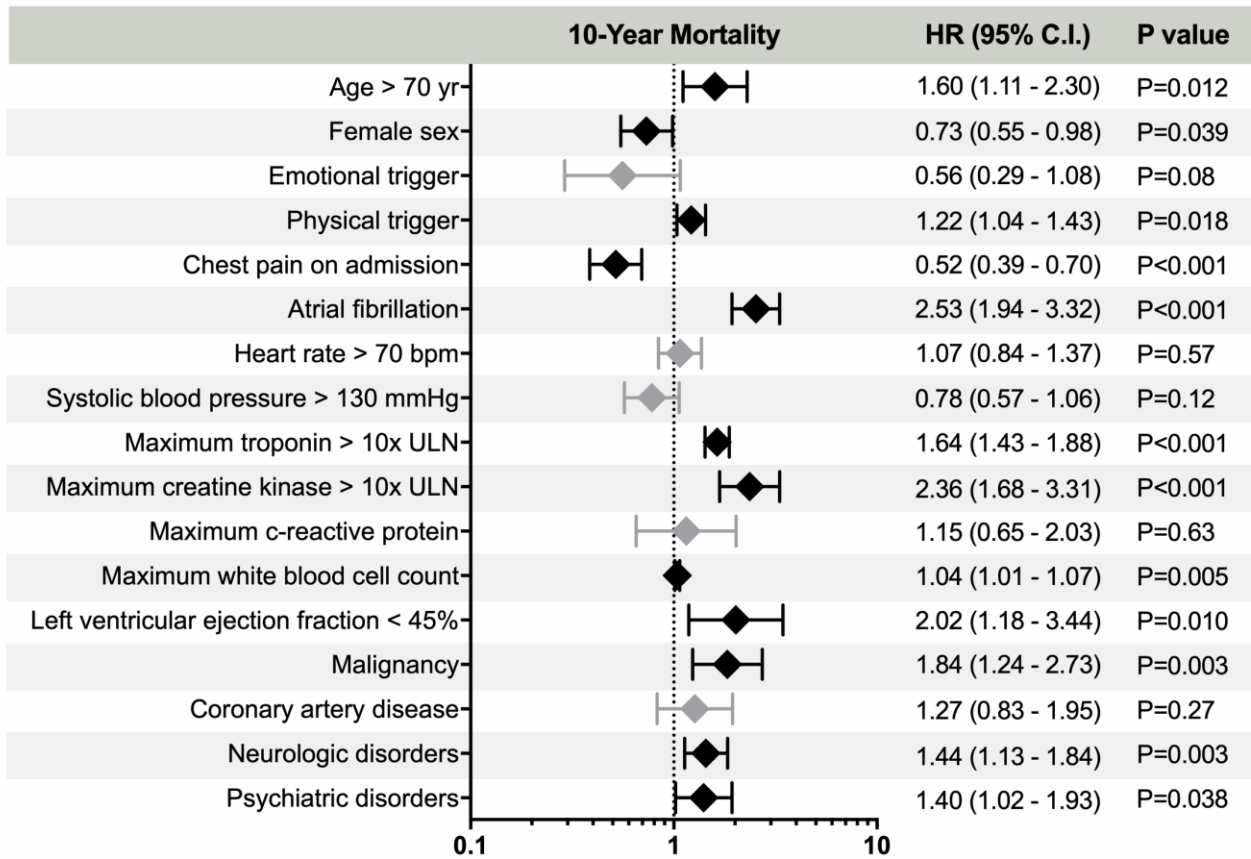

Cox-regression with cluster robust standard errors adjusting for the nine participating countries revealed similar results as that without clustering.

Black, statistically significant predictors; grey, not significant.

CI, confidence interval; HR, hazard ratio; ULN, upper limit of the normal range.
